# Supplementary material for: Multivariate genomic architecture of cortical thickness and surface area at multiple levels of analysis
Source: PubMed Central journal article supplement (PMC9941500; doi:10.1038/s41467-023-36605-x), 2023-02-20
Supplement: 41467_2023_36605_MOESM3_ESM.pdf [file 41467_2023_36605_MOESM3_ESM.pdf]

## **Description of Additional Supplementary Files**

File Name: Supplementary Data 1

Description: Exploratory Factor Analysis Standardized Loadings

File Name: Supplementary Data 2

Description: Cortical Thickness Genomic SEM Confirmatory Factor Model Results in ENIGMA

File Name: Supplementary Data 3

Description: Surface Area Genomic SEM Confirmatory Factor Model Results

File Name: Supplementary Data 4

Description: Model Fit from Confirmatory Factor Models fit in Genomic SEM

File Name: Supplementary Data 5

Description: Left Hemisphere Cortical Thickness Genomic SEM Confirmatory Factor Model Results in UK Biobank

File Name: Supplementary Data 6

Description: Right Hemisphere Cortical Thickness Genomic SEM Confirmatory Factor Model Results in UK Biobank

File Name: Supplementary Data 7

Description: Left Hemisphere Surface Area Genomic SEM Confirmatory Factor Model Results in UK Biobank

File Name: Supplementary Data 8

Description: Right Hemisphere Surface Area Genomic SEM Confirmatory Factor Model Results in UK Biobank

File Name: Supplementary Data 9

Description: Topographical Annotation

File Name: Supplementary Data 10

Description: Stratified Genomic SEM Enrichment Results for Cortical Thickness

File Name: Supplementary Data 11

Description: Stratified Genomic SEM Enrichment Results for Surface Area

File Name: Supplementary Data 12

Description: Genetics Correlations with the UKB g-factor

File Name: Supplementary Data 13

Description: Confirmatory Factor Results from Psychiatric Measurement Model

File Name: Supplementary Data 14

Description: Genetics Correlations with the Psychiatric Factors
